# Supplementary material for: Surgical Modification of the Murine Calvaria Osteolysis Model
Source: Hindawi journal article supplement (doi:10.1155/2015/802697), 2015-01-01
Supplement: f1 [file 802697.f1.pdf]

# **Surgical modification of the murine calvaria osteolysis model**

## **Supplementary Materials**

Ali Mohammed AL-Quhali ,Yu Sun, Xizhuang Bai  
et al.

# Wound closure with skin clip in Group 1 (modified paraclip technique)

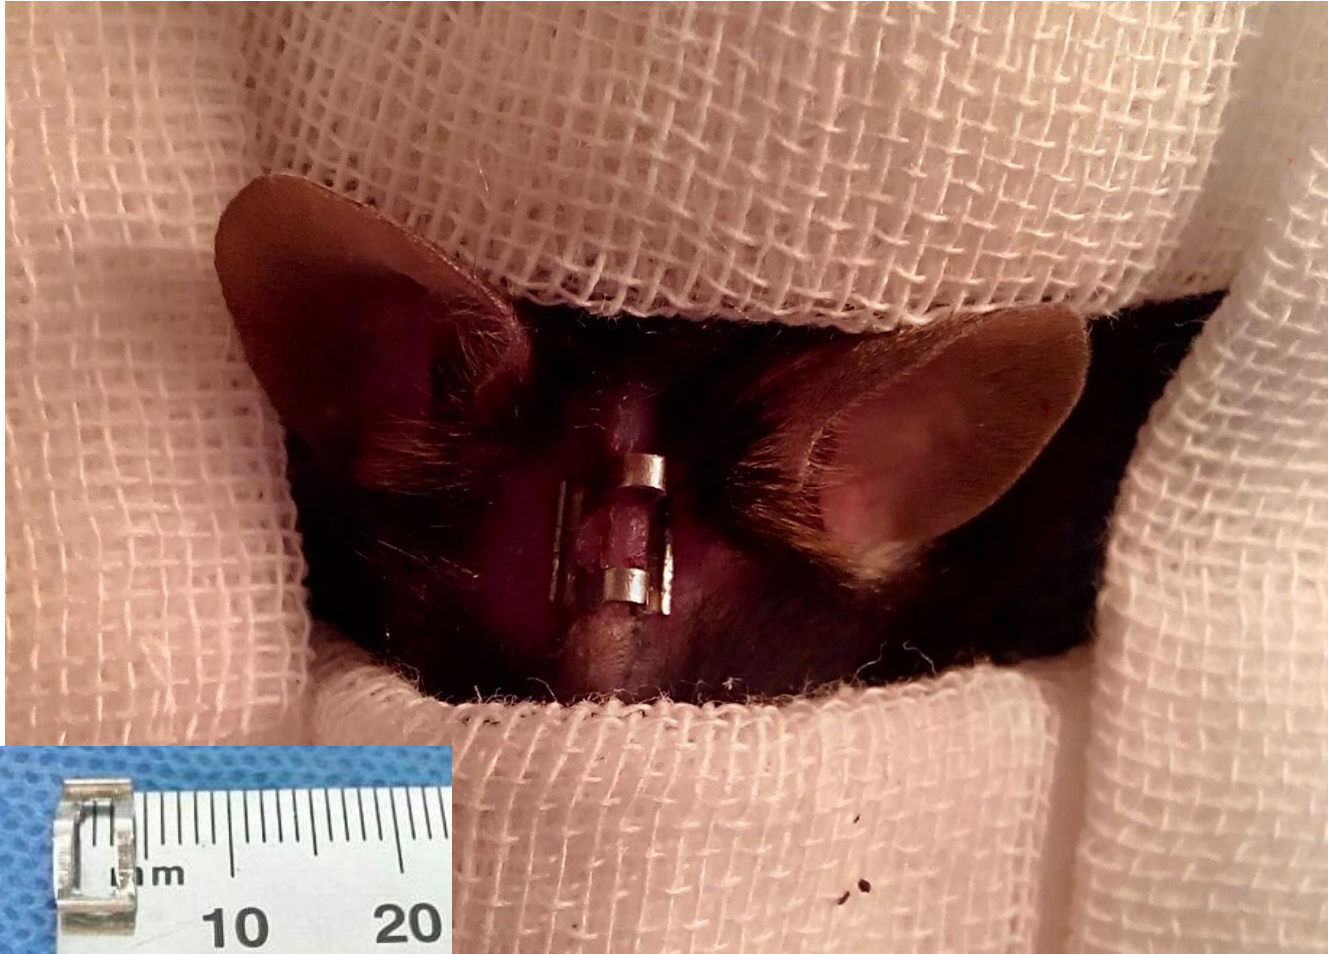

The figures show the incision between ears closed by skin clip.

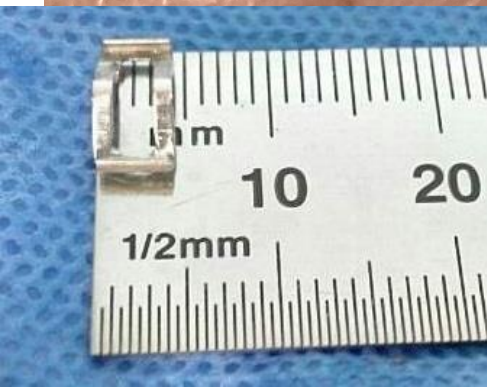

# **Normal incision healing after clip removal in Group 1 (modified paraclip technique)**

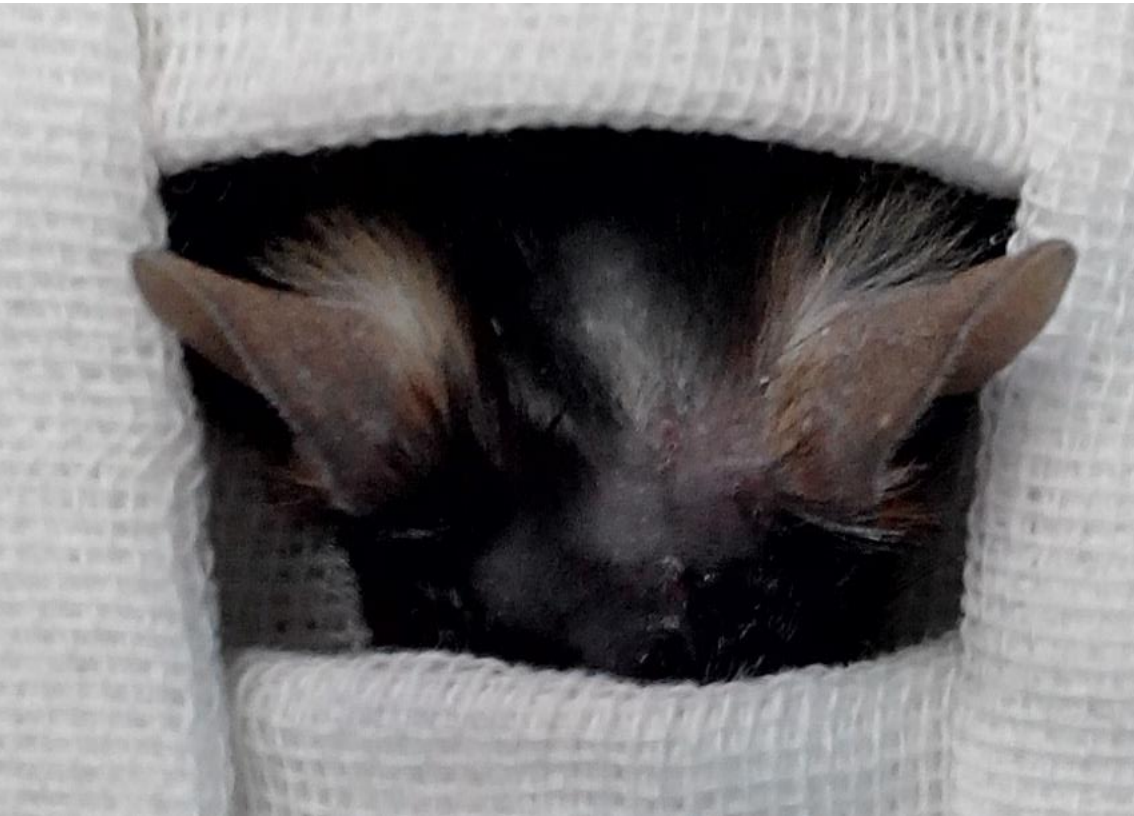

**The figure shows the normal incision healing absent of inflammation, swelling or other complications.**

# Wound dehiscence and bone exposure in Group 2 (conventional transsuture technique)

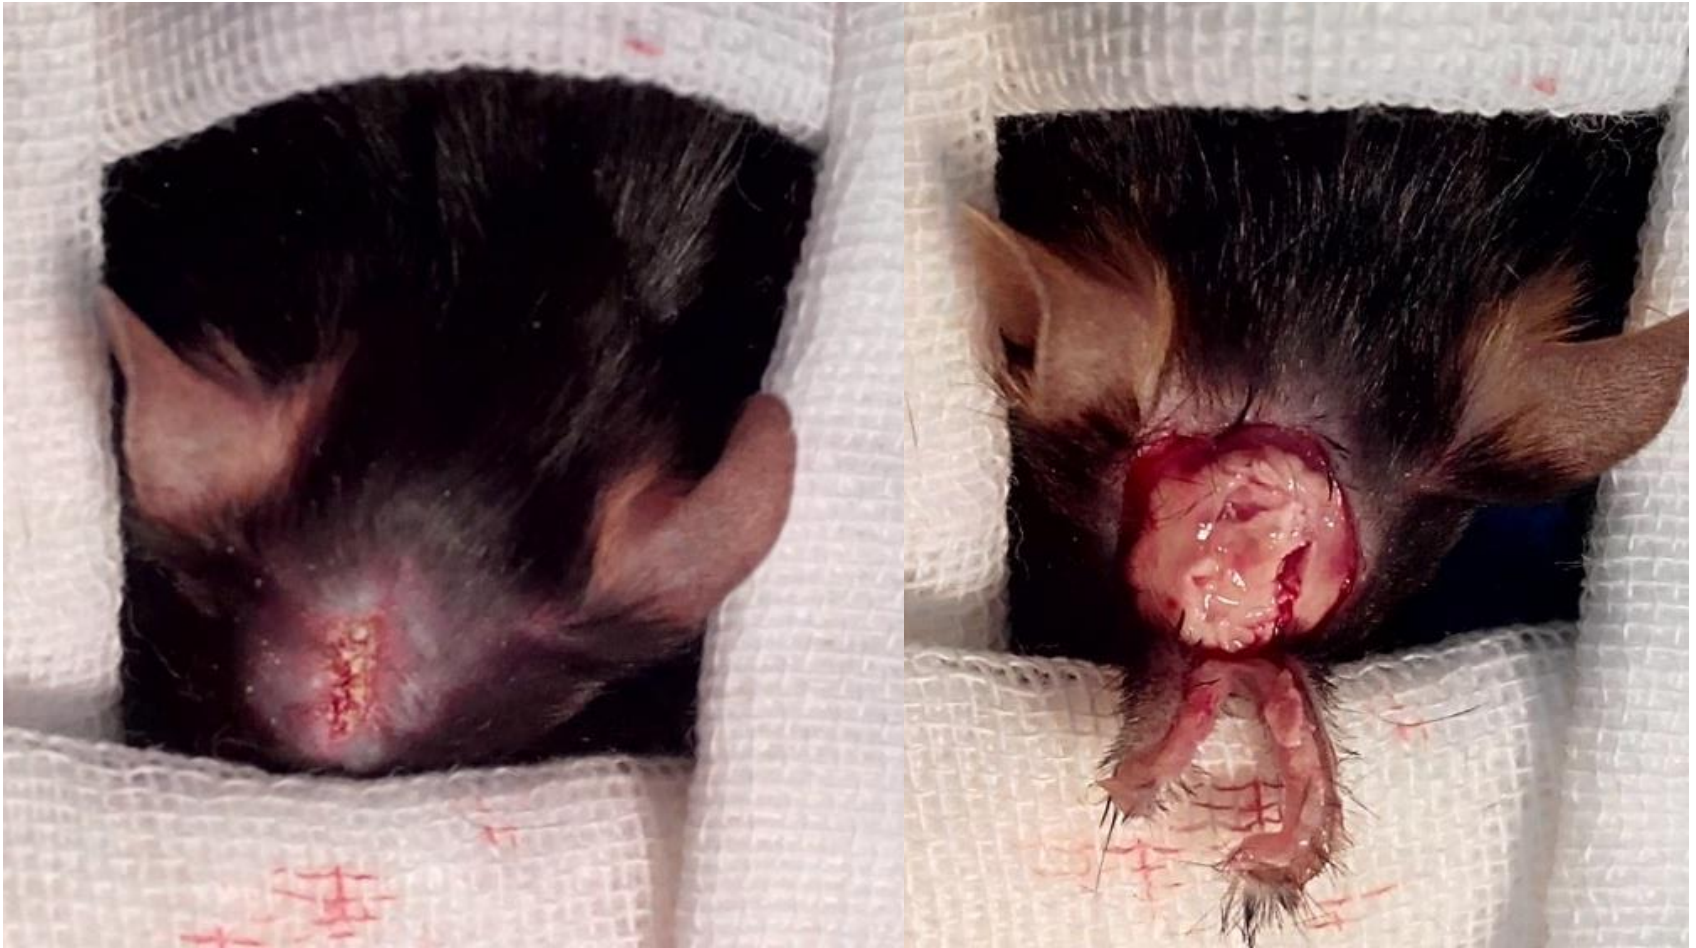

The figures show wound dehiscence and inflamed incision. Bone inflammation & infection secondary to peripheral soft tissue disorders.

# Conventional surgical technique

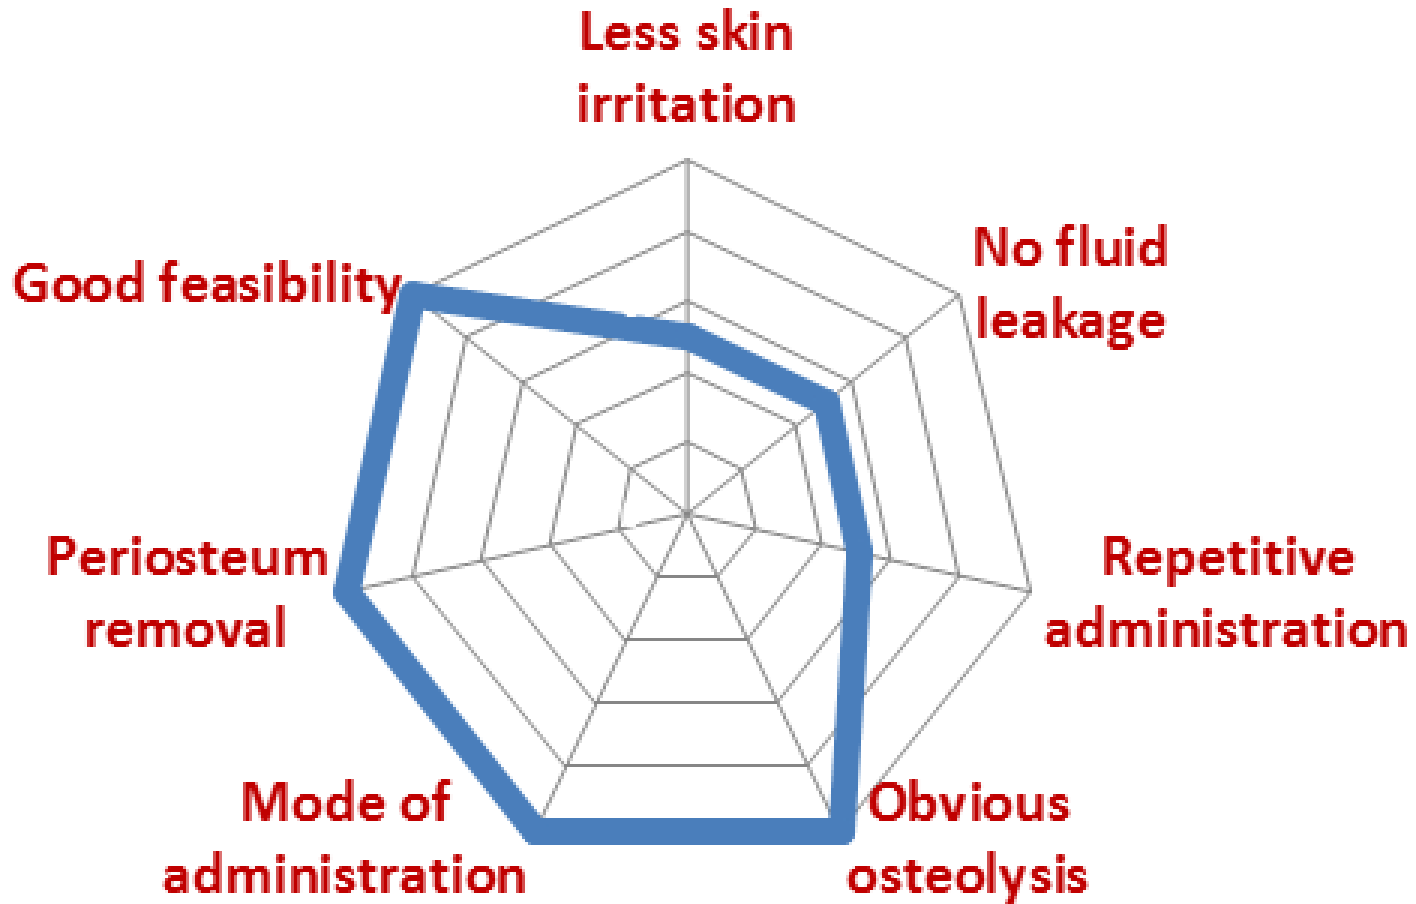

The schematic illustration indicates the advantages and disadvantages of Conventional surgical technique.

# Percutaneous injection technique

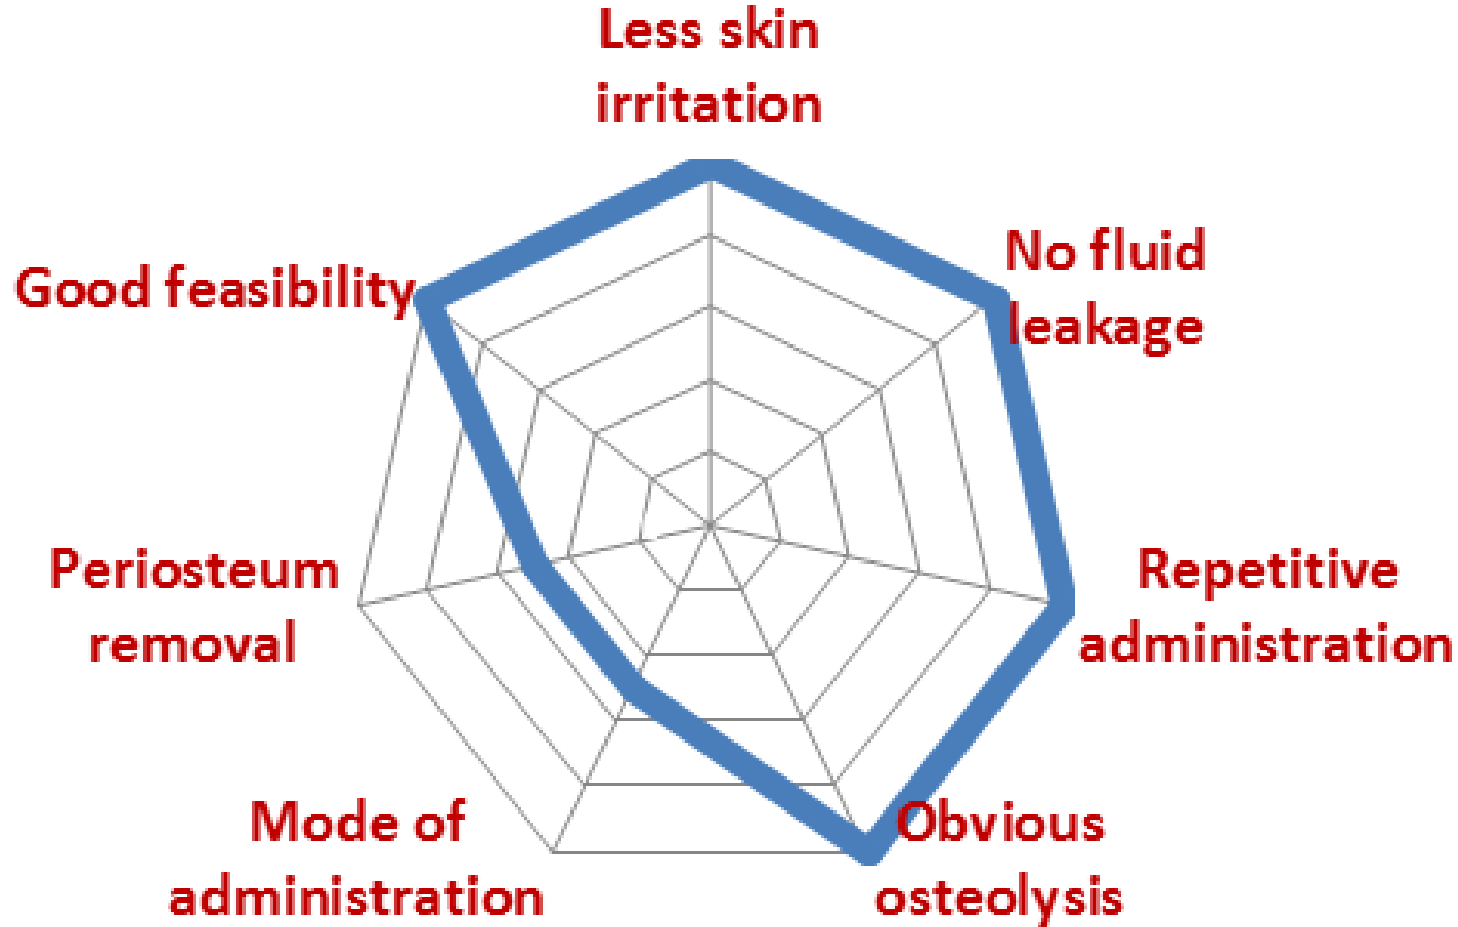

The schematic illustration indicates the advantages and disadvantages of Percutaneous injection technique.

# Modified para-clip technique

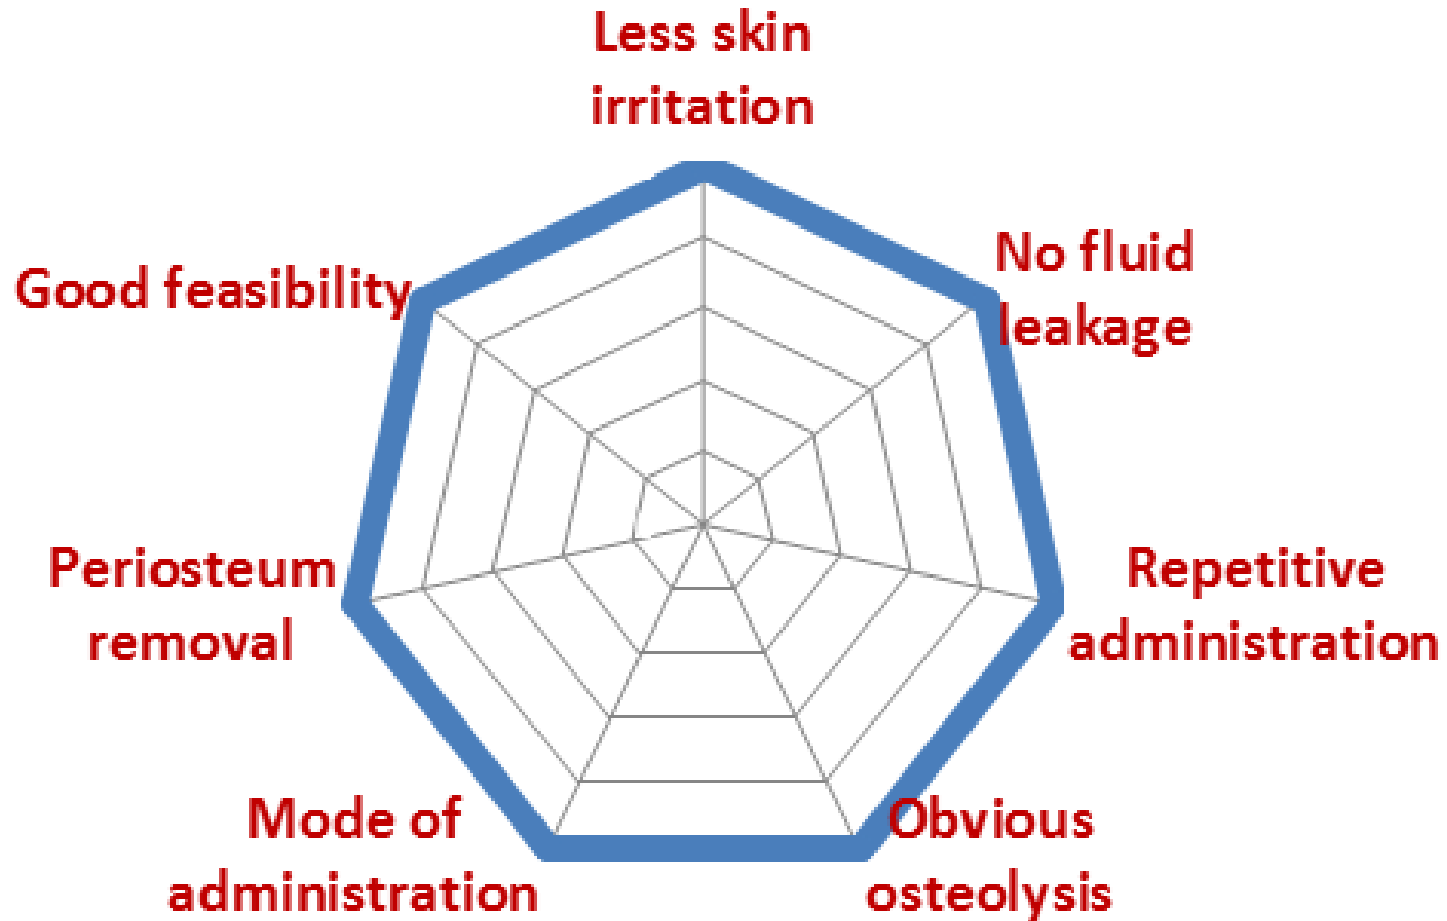

The schematic illustration indicates the advantages of Modified paraclip technique .
